# Supplementary material
Source: PubMed Central journal article supplement (PMC3003389)
Supplement: supp_M110.133843_jbc.M110.133843-1.pdf [file supp_M110.133843_jbc.M110.133843-1.pdf]

## Supplementary information

Supplemental Table S1: Parameters for 10 best HADDOCK score clytin-cgGFP structures

| No. | HADDOCK score | $E_{\text{inter}}$<br>(kcal/mol) | $E_{\text{vdw}}$<br>(kcal/mol) | $E_{\text{elec}}$<br>(kcal/mol) | $E_{\text{AIR}}$<br>(kcal/mol) | # AIR Viol<br>(>0.3 Å) | Buried Surface Area<br>(Å <sup>2</sup> ) |
|-----|---------------|----------------------------------|--------------------------------|---------------------------------|--------------------------------|------------------------|------------------------------------------|
| 1   | -74.8967      | -418.801                         | -74.6484                       | -470.344                        | 126.191                        | 3                      | 2075.08                                  |
| 2   | -67.5366      | -421.660                         | -48.1242                       | -473.232                        | 99.696                         | 3                      | 1776.07                                  |
| 3   | -66.4241      | -524.712                         | -44.4435                       | -531.243                        | 50.974                         | 2                      | 1916.30                                  |
| 4   | -59.1989      | -370.435                         | -66.8908                       | -350.278                        | 46.732                         | 2                      | 1877.61                                  |
| 5   | -58.8372      | -344.882                         | -56.8040                       | -431.780                        | 143.702                        | 3                      | 1873.40                                  |
| 6   | -58.2819      | -380.386                         | -64.2805                       | -378.293                        | 62.187                         | 1                      | 1960.47                                  |
| 7   | -57.7164      | -359.531                         | -56.3633                       | -409.118                        | 105.950                        | 2                      | 2018.77                                  |
| 8   | -56.9657      | -300.890                         | -45.4271                       | -465.896                        | 210.432                        | 6                      | 1834.81                                  |
| 9   | -55.0314      | -306.929                         | -61.3414                       | -377.973                        | 132.386                        | 3                      | 1916.81                                  |
| 10  | -54.9634      | -399.903                         | -47.4098                       | -397.164                        | 44.671                         | 1                      | 1885.00                                  |

# AIR Viol = number of AIR violations

A

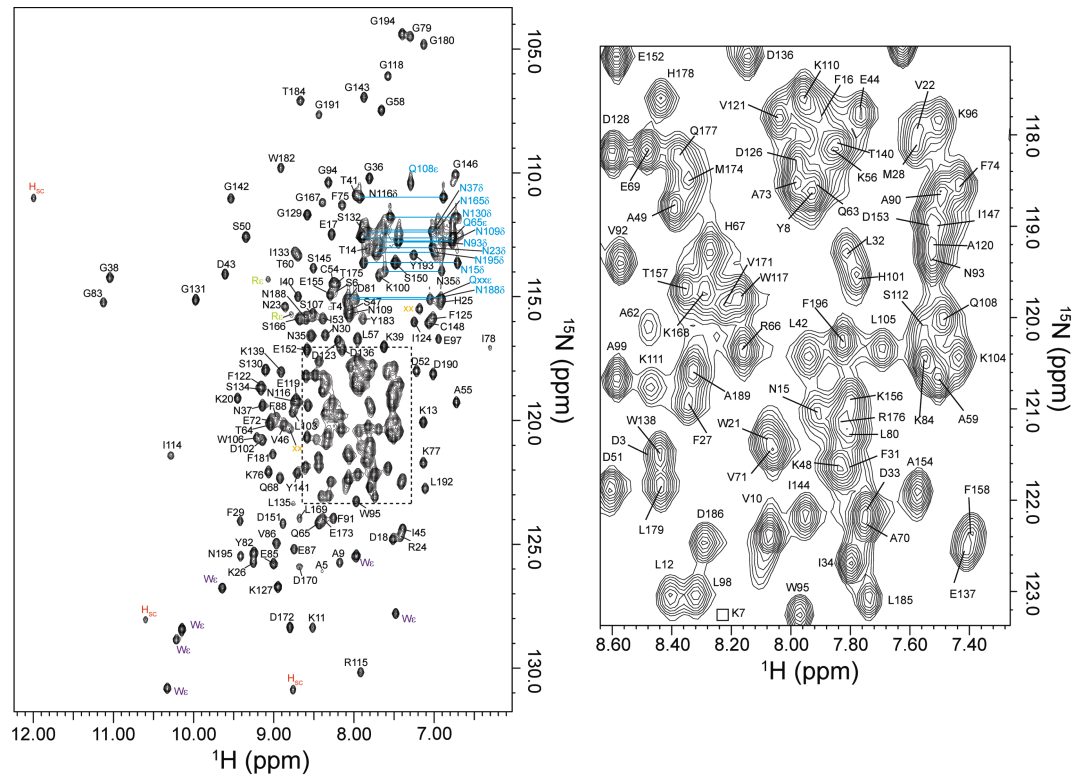

B

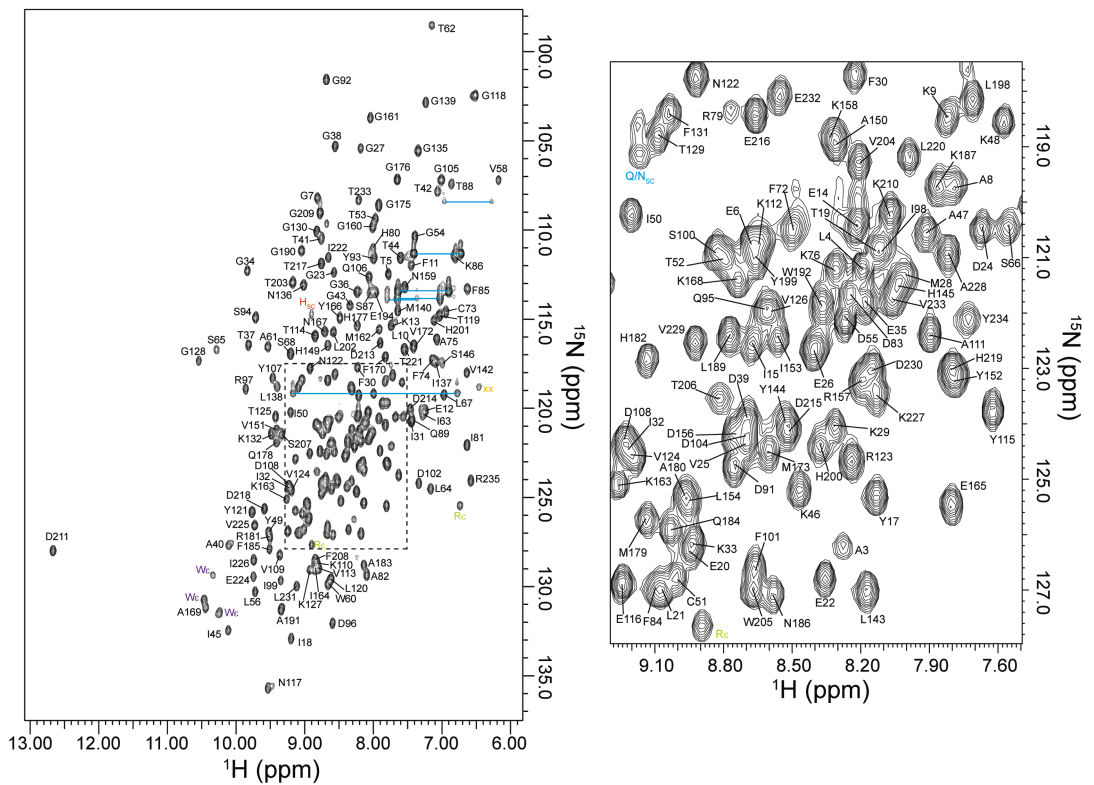

Supplemental Fig. 1S: The assigned  $^1\text{H}$ - $^{15}\text{N}$  HSQC spectra of clytin (A) and cgGFP (B). Also shown are the peaks of side chain groups of Gln and Asn (cyan), Arg (peridot), His (red), and Trp (purple). Peaks without assignment are orange.

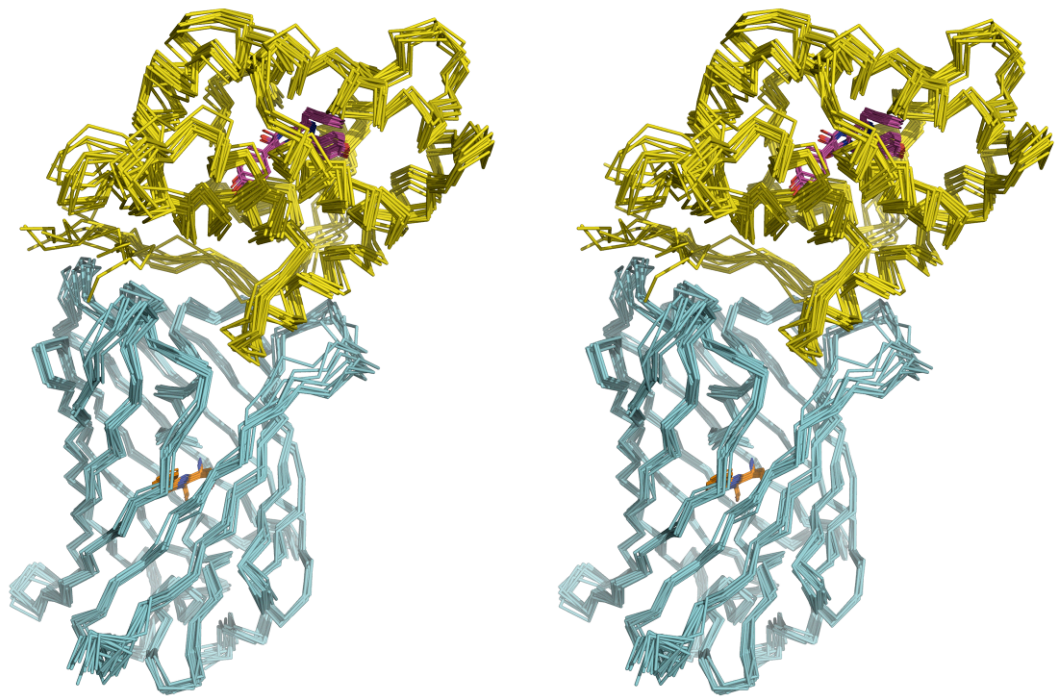

Supplemental Fig. 2S: Stereoview of the superposed ten lowest energy structures of the clytin-cgGFP complex generated by HADDOCK.

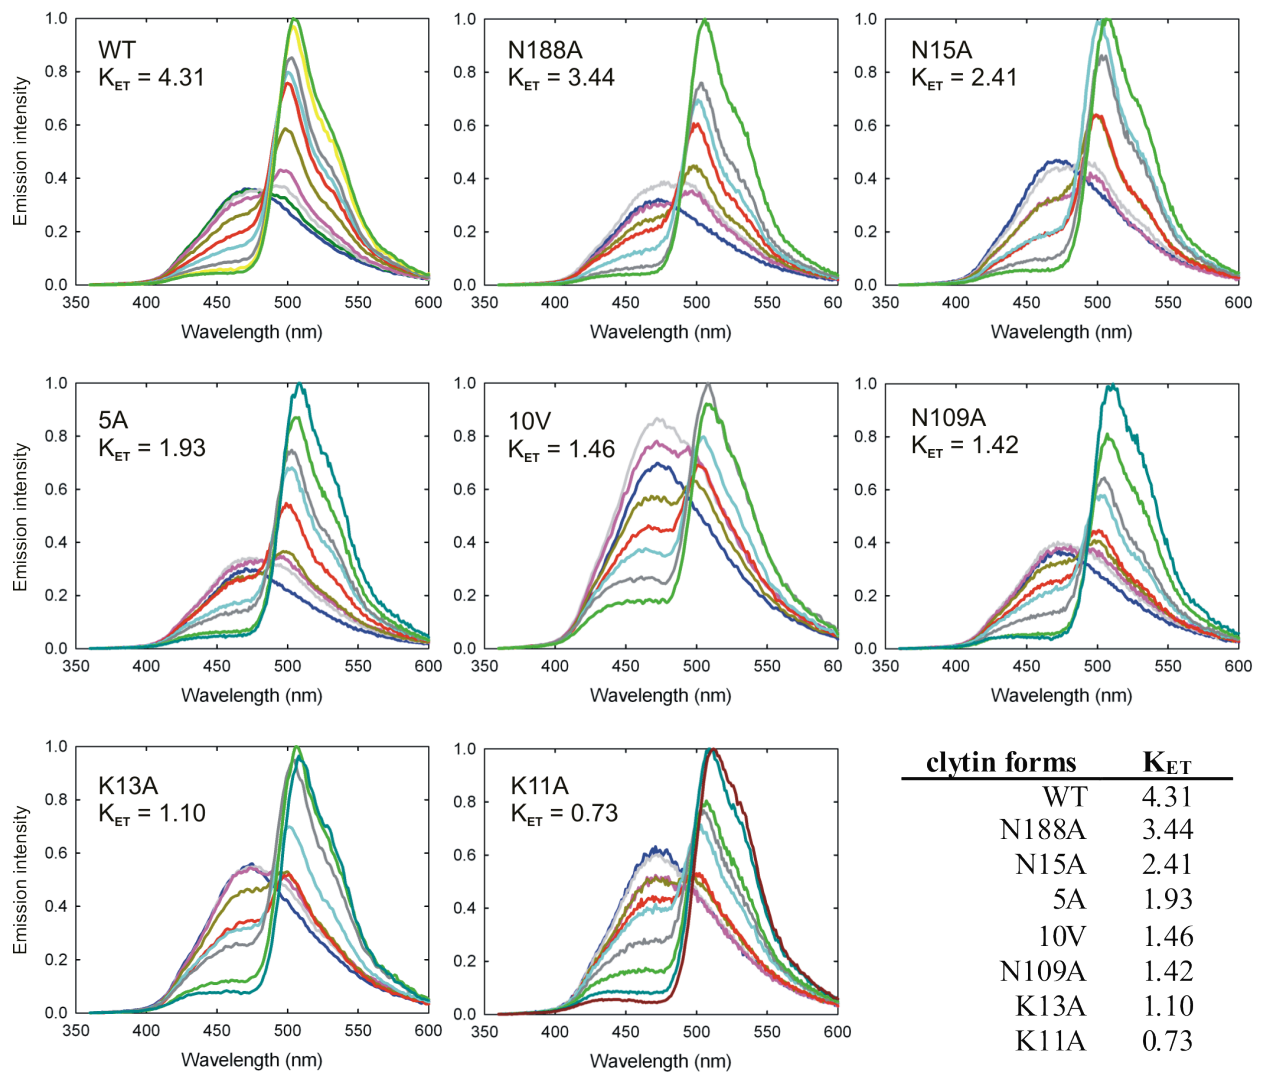

Supplemental Fig. 3S: Bioluminescence color-shift assay of clytin mutants showing the effect of mutation on the energy transfer measured as  $K_{ET}$ . The bioluminescence spectra were obtained upon titration with *cgGFP* (0–19.40  $\mu\text{M}$ ; — 0  $\mu\text{M}$ , — 0.06  $\mu\text{M}$ , — 0.12  $\mu\text{M}$ , — 0.30  $\mu\text{M}$ , — 0.61  $\mu\text{M}$ , — 1.21  $\mu\text{M}$ , — 2.42  $\mu\text{M}$ , — 4.85  $\mu\text{M}$ , — 9.70  $\mu\text{M}$ , — 19.40  $\mu\text{M}$ ). For wild type (WT) clytin the color code is as follows: — 0  $\mu\text{M}$ , — 0.03  $\mu\text{M}$ , — 0.06  $\mu\text{M}$ , — 0.12  $\mu\text{M}$ , — 0.30  $\mu\text{M}$ , — 0.61  $\mu\text{M}$ , — 0.90  $\mu\text{M}$ , — 1.80  $\mu\text{M}$ , — 3.00  $\mu\text{M}$ , — 4.24  $\mu\text{M}$  of *cgGFP*. The concentration of clytin was in the 0.4–1.5  $\mu\text{M}$  range.  $K_{ET}$  was determined as the slope of the  $I_{500}/I_{470}$  ratio versus *cgGFP* concentration, where  $I_{500}$  and  $I_{470}$  are bioluminescence intensities at 500 nm and 470 nm, respectively.

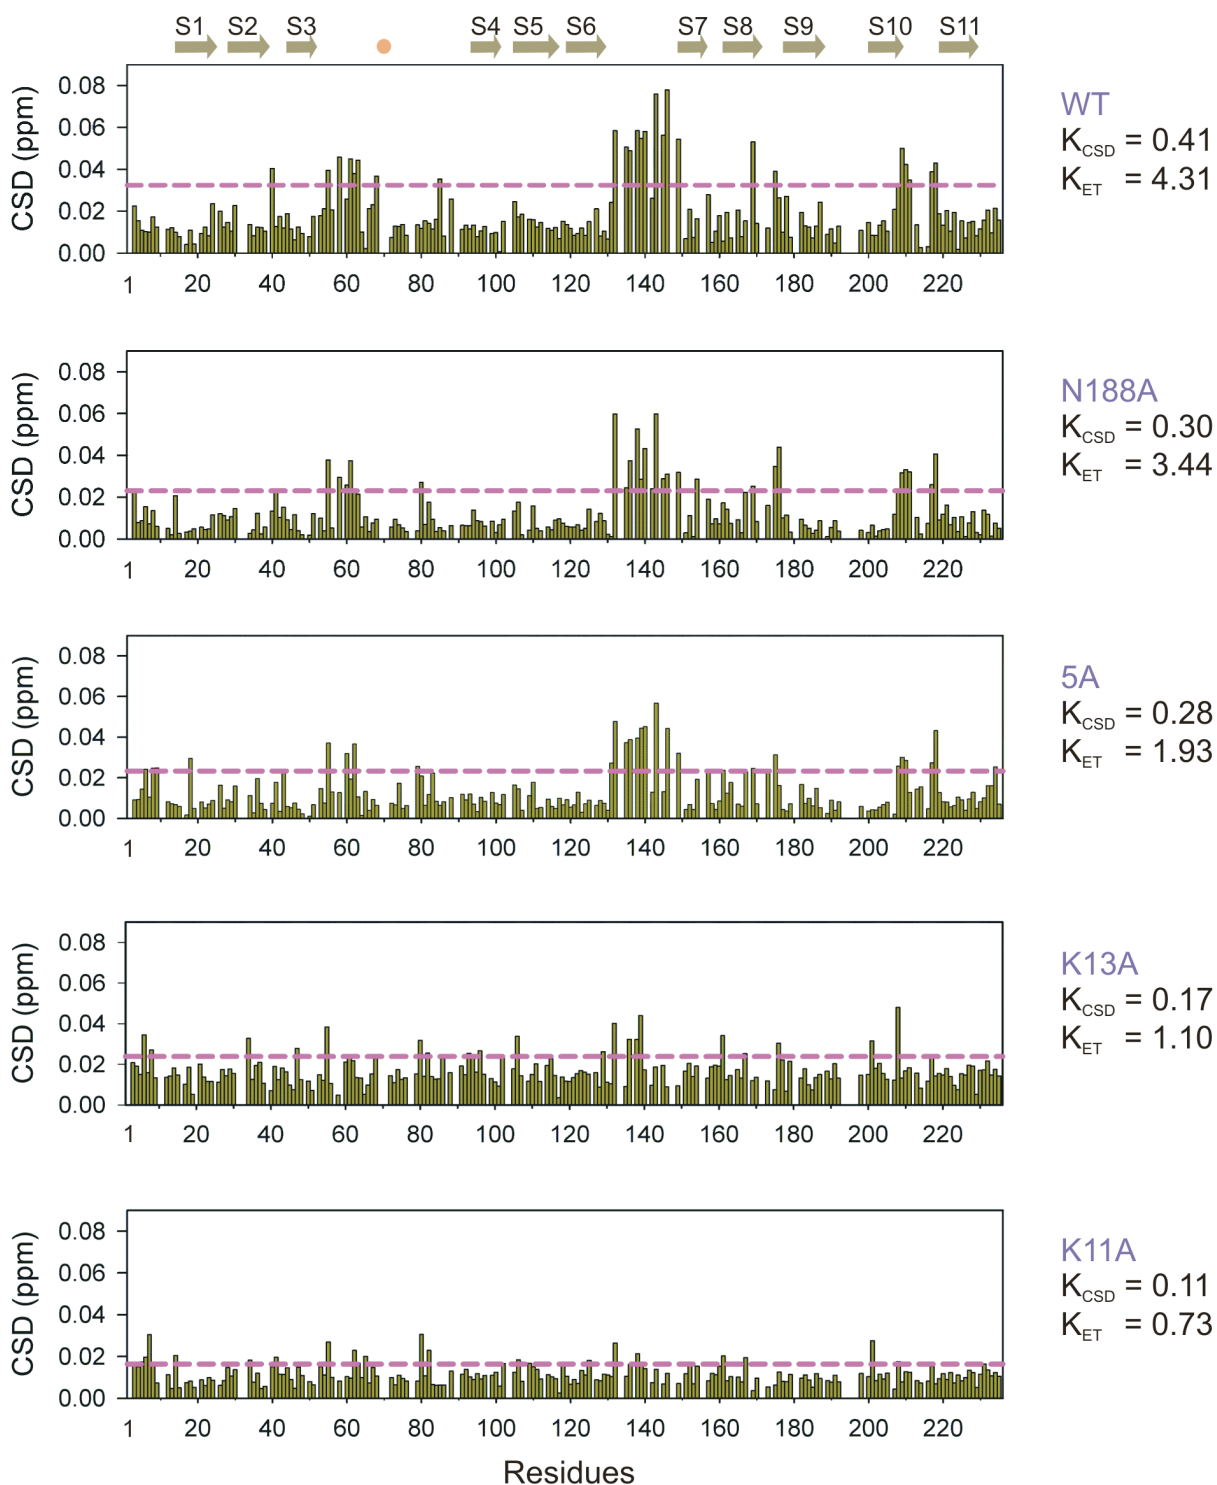

Supplemental Fig. 4S: Chemical shift perturbation plots of  $^{15}\text{N}$ ,  $^2\text{H}$ -labelled *cgGFP* upon addition of 1 : 2 molar excess of wild type clytin or clytin mutants (N188A, 5A, K13A, K11A). The corresponding  $K_{\text{CSD}}$  and  $K_{\text{ET}}$  values for each clytin form are shown. CSD = chemical shift difference.  $K_{\text{CSD}}$  was determined as a sum of CSD above the average CSD plus one standard deviation cut-off (*purple dashed line*) in ppm units.

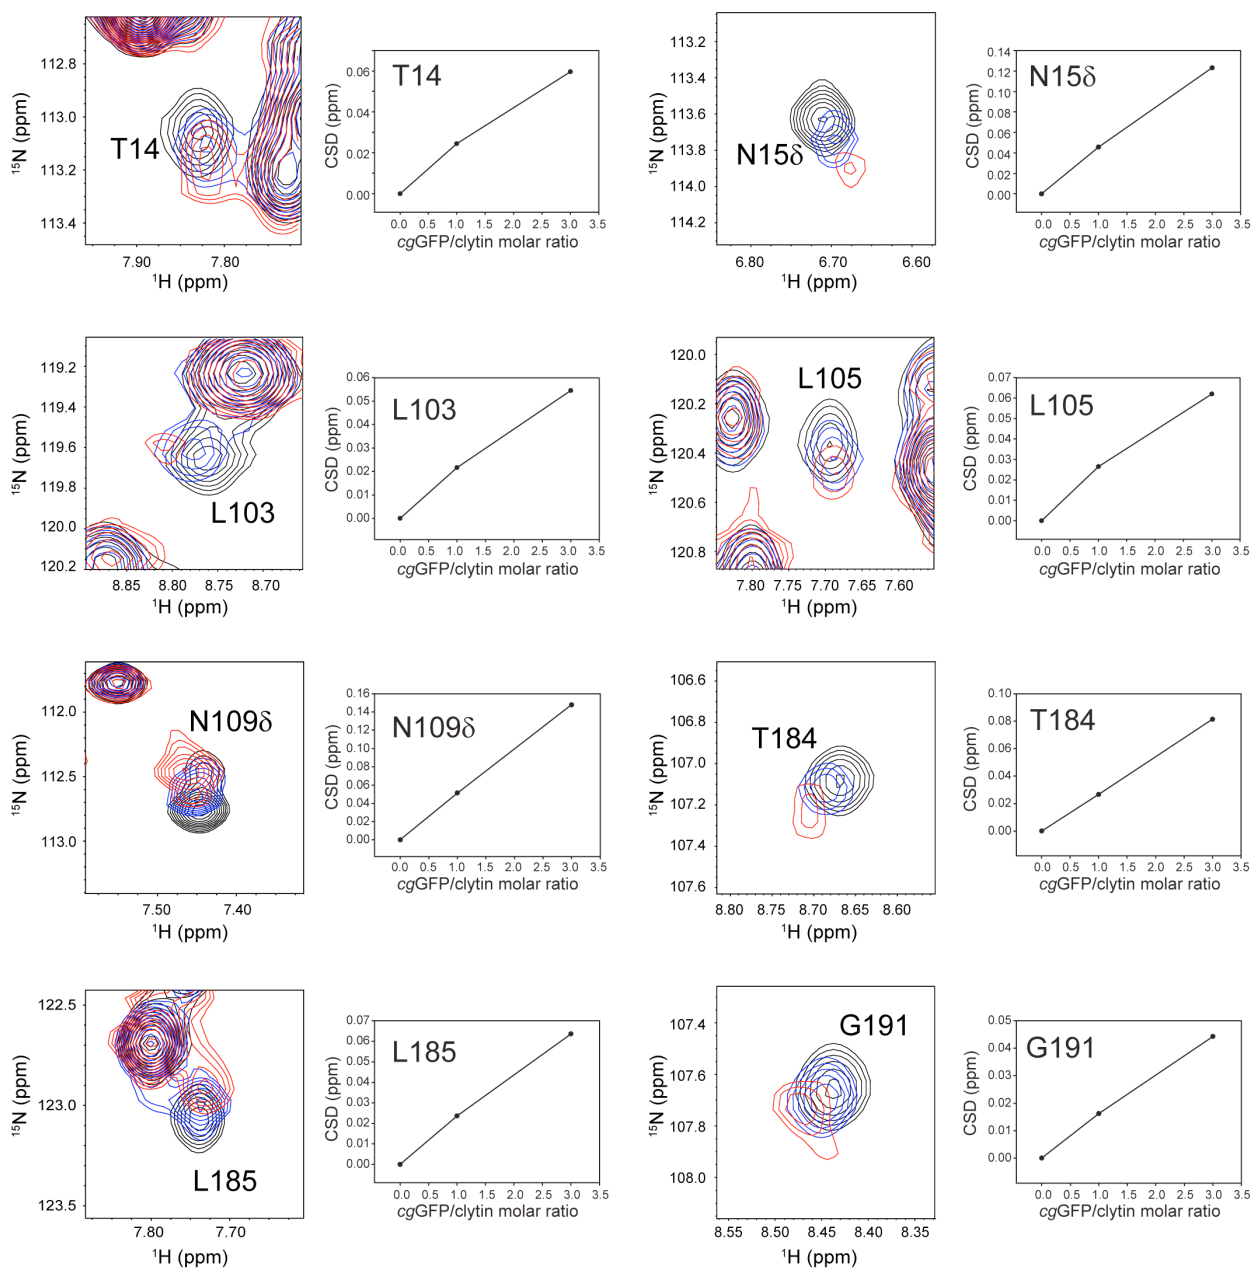

Supplemental Fig. 5S: Superposition of  $^1\text{H}$ - $^{15}\text{N}$  HSQC spectra of  $^{15}\text{N}$ -labelled clytin (0.2 mM) upon titration with *cgGFP* (0.2 mM or 0.6 mM, with the last value being close to the solubility limit) showing chemical shift perturbations of the single residues of clytin (T14, N15 $\delta$ , L103, L105, N109 $\delta$ , T184, L185 and G191). Clytin peaks are *black*; clytin peaks upon addition of *cgGFP* at 1:1 and 1:3 ratio are *blue* and *red*, respectively. The chemical shift differences (CSD) versus the molar ratio of *cgGFP* and clytin are plotted on the right of the corresponding zoomed in regions of  $^1\text{H}$ - $^{15}\text{N}$  HSQC spectra.

Supplemental Files:

clytin-cgGFP\_haddockfit\_1.pdb  
clytin-cgGFP\_haddockfit\_2.pdb  
clytin-cgGFP\_haddockfit\_3.pdb  
clytin-cgGFP\_haddockfit\_4.pdb  
clytin-cgGFP\_haddockfit\_5.pdb  
clytin-cgGFP\_haddockfit\_6.pdb  
clytin-cgGFP\_haddockfit\_7.pdb  
clytin-cgGFP\_haddockfit\_8.pdb  
clytin-cgGFP\_haddockfit\_9.pdb  
clytin-cgGFP\_haddockfit\_10.pdb
